# Supplementary material
Source: publisher figshare collection journal article supplement (https://frontiersin.figshare.com/ndownloader/files/26881352)
Supplement: Supplementary file [file 26881352]

## APPENDIX A

Table S1. Clusters of lessons with different disengagement patterns

| Lesson Name                                                                                                                                                                | Fast-disengage (%) | Slow-disengage (%) |
|----------------------------------------------------------------------------------------------------------------------------------------------------------------------------|--------------------|--------------------|
| <b>Cluster 1: Proportion of fast- and slow-disengaged question-answer observations are balanced and at medium level</b>                                                    |                    |                    |
| 01-Text Signals                                                                                                                                                            | 1.7                | 2.7                |
| 02- Purpose of Texts                                                                                                                                                       | 3.5                | 3.4                |
| 03-Complex Texts                                                                                                                                                           | 2.1                | 2.0                |
| 06-Word Meaning Clues                                                                                                                                                      | 2.0                | 2.5                |
| 10-Non-Literal Language                                                                                                                                                    | 2.1                | 2.1                |
| 15-Story Maps                                                                                                                                                              | 1.8                | 3.7                |
| 28-Inferences from Texts                                                                                                                                                   | 2.3                | 2.9                |
| <b>Cluster 2: Proportion of fast-disengaged question-answer observations is low and proportion of slow-disengaged question-answer observations is high</b>                 |                    |                    |
| 04- Word Parts                                                                                                                                                             | 1.4                | 6.7                |
| 07-Learning New Words                                                                                                                                                      | 0.6                | 6.3                |
| 09-Pronouns                                                                                                                                                                | 1.6                | 4.1                |
| 12- Key Information                                                                                                                                                        | 1.1                | 4.0                |
| 19-Claims versus Support                                                                                                                                                   | 1.3                | 4.3                |
| 20-Problems and Solutions                                                                                                                                                  | 0.7                | 4.8                |
| 21-Cause and Effect                                                                                                                                                        | 1.1                | 3.9                |
| 24-Time and Order                                                                                                                                                          | 2.6                | 5.7                |
| 29-Complex Persuasive Texts                                                                                                                                                | 1.3                | 4.6                |
| 30-Forms and Documents                                                                                                                                                     | 1.3                | 3.9                |
| <b>Cluster 3: Proportion of fast-disengaged question-answer observations is low and proportion of slow-disengaged question-answer observations is at low-medium level.</b> |                    |                    |
| 05-Punctuation                                                                                                                                                             | 0.8                | 3.0                |
| 08-Multiple Meaning Words                                                                                                                                                  | 1.1                | 2.4                |
| 11-Review 1                                                                                                                                                                | 0.6                | 3.1                |
| 13-A Personal Story                                                                                                                                                        | 0.7                | 0.5                |
| 14-Connecting Ideas                                                                                                                                                        | 1.7                | 0.6                |
| 16-Main Ideas                                                                                                                                                              | 1.7                | 1.6                |
| 17-Persuasive Texts                                                                                                                                                        | 1.1                | 2.5                |
| 18-Review 2                                                                                                                                                                | 1.3                | 2.3                |
| 22-Describing Things                                                                                                                                                       | 1.0                | 1.3                |
| 23-Compare and Contrast                                                                                                                                                    | 0.6                | 3.0                |
| 25-Steps in Procedures                                                                                                                                                     | 1.2                | 1.5                |
| 26-Review 3                                                                                                                                                                | 1.9                | 1.7                |
| 27-Complex Stories                                                                                                                                                         | 0.3                | 2.0                |
